# Supplementary material
Source: publisher figshare collection journal article supplement (https://sage.figshare.com/ndownloader/files/15592544)

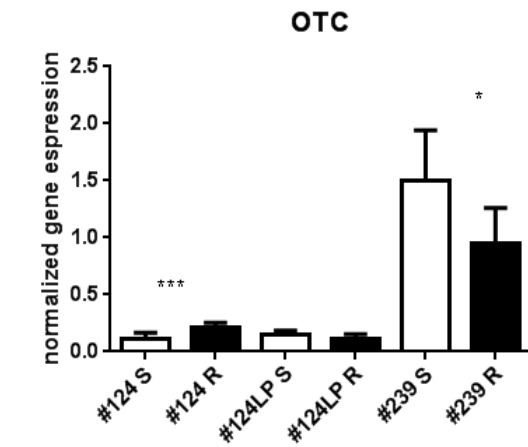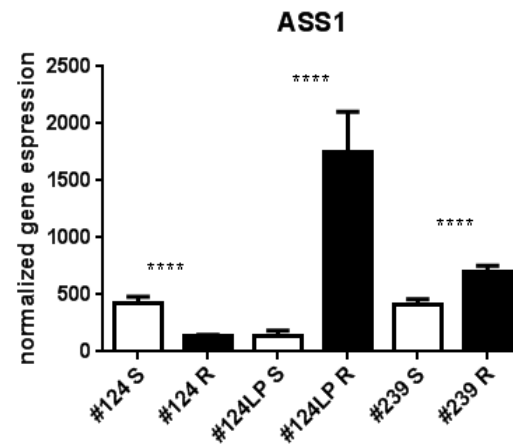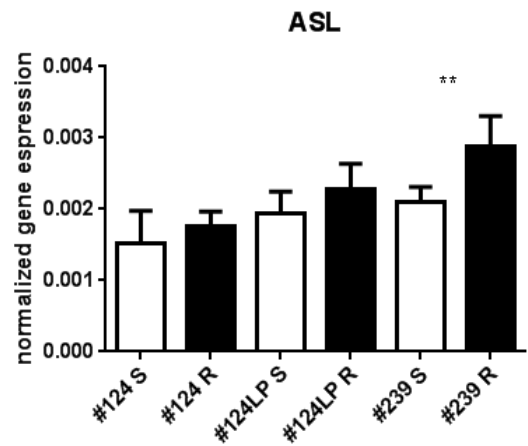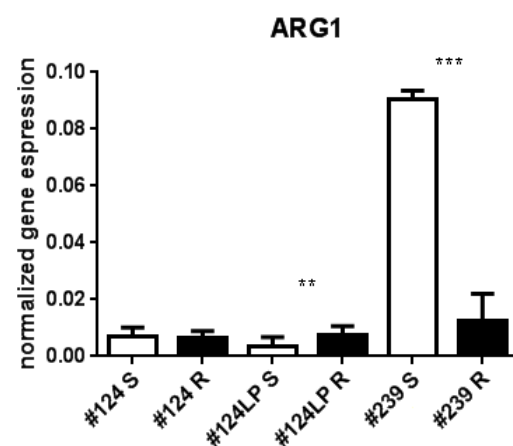

Supplementary Figure 3.

Supplement: Supplementary file 1 [file 15592544]
